# Supplementary material
Source: Royal Society of Chemistry journal article supplement (doi:10.1039/d6cy00192k)
Supplement: d6cy00192k1.pdf [file d6cy00192k1.pdf]

## SUPPLEMENTARY INFORMATION

### Enhanced N<sub>2</sub> capture and cleavage promoted by lithium nanoparticles

José Miguel Doña-Rodríguez,<sup>a</sup> Raúl Quesada-Cabrera,<sup>a</sup>  
Douglas R. MacFarlane,<sup>b</sup> Alexandr N. Simonov<sup>\*b</sup> and Luis Miguel Azofra<sup>\*a</sup>

<sup>a</sup> Instituto de Estudios Ambientales y Recursos Naturales (i-UNAT), Universidad de Las Palmas de Gran Canaria (ULPGC), Campus de Tafira, 35017 Las Palmas de Gran Canaria, Spain.

<sup>b</sup> School of Chemistry, Monash University, Clayton, Victoria 3800, Australia.

\*Authors to whom correspondence should be addressed:

[alexandr.simonov@monash.edu](mailto:alexandr.simonov@monash.edu) (ANS), [luismiguel.azofra@ulpgc.es](mailto:luismiguel.azofra@ulpgc.es) (LMA)

---

## Section 1. Methodology

The mechanism of N<sub>2</sub> capture and cleavage by lithium sub-nanoclusters and nanoparticles was studied by density functional theory (DFT) through the generalised gradient approximation (GGA) with the revised Perdew–Burke–Ernzerhof (RPBE) with Pade approximation<sup>1</sup> as functional and a plane-wave cut-off energy of 400 eV. Body-centred cubic (bcc) unit cell of metallic lithium, Li<sup>0</sup>, was fully optimised with very tight convergence criteria, specifically, energy and force convergence limits equal to 10<sup>-5</sup> eV/atom and |0.001| eV/Å, respectively. For this, the Brillouin zone (periodic boundary conditions) was sampled *via* the Monkhorst–Pack scheme,<sup>2</sup> increasing the number of *k*-points up to electronic energy differences less than |0.01| eV. Once optimised the bulk structure of bcc-Li<sup>0</sup>, different Li<sup>0</sup> nanostructures of spherical shape were built and re-optimised ( $\Gamma$  point; *viz.* 1×1×1 *k*-points) with a vacuum width of 10 Å at each side of the X, Y, and Z coordinates. For the modelling of the clean Li<sup>0</sup> lithium sub-nanoclusters and nanoparticles and N<sub>2</sub> adsorbed states, energy and force convergence limits were set to 10<sup>-4</sup> eV/atom and |0.01| eV/Å, respectively. Transition states (TS) for N<sub>2</sub> cleavage were located using the improved DIMER (IMD) method,<sup>3,4</sup> increasing the cut-off for force convergence to |0.03| eV/Å. In all cases, explicit dispersion correction terms in the energy were included through the D3 method with the standard parameters programmed by Grimme and co-workers.<sup>5,6</sup> Free energies were calculated for gases, Li<sup>0</sup> sub-nanoclusters and nanoparticles, and adsorbates as explained in **Section 2** of this Supplementary Information. All optimisation and vibrational frequency (harmonic) calculations were performed throughout the facilities provided by the Vienna *Ab Initio* Simulation Package (VASP, version 5.4.4).<sup>7–10</sup> In this sense, minima and TSs were corroborated by the presence of none and one imaginary frequency, respectively. A series of NVT [substance (N), volume (V), and temperature (T); canonical ensemble] molecular dynamics (MD) simulations at quantum level were carried out to analyse the diffusion effects of N<sub>2</sub> on and within the Li<sub>51</sub> nanoparticle model. All *ab initio* MD simulations were carried out at the same level of theory as the optimisations, with time steps of 0.5 fs.

## Section 2. Thermochemistry

Free energy calculations have been carried out as it follows:

$$G = E + \int C_p dT - TS$$

where  $G$ ,  $E$ , and  $C_p$  refer to the free energy, electronic energy, and heat capacity, respectively. The entropy term,  $S$ , can be expressed as the sum of the translational, rotational, vibrational, and electronic contributions as it follows:

$$S = S_t + S_r + S_v + S_e$$

Finally, intrinsic zero-point energy (ZPE) and extrinsic dispersion ( $D$ ) corrections were included to obtain this expression:

$$G = E + \int C_p dT - T(S_t + S_r + S_v + S_e) + \text{ZPE} + D$$

For  $N_2$  gas at standard conditions (298.15 K of temperature, 1 atm of fugacity),  $S_e \approx 0$  at the fundamental electronic level. Thus, **Table S1** gathers the thermodynamic quantities for this species.

**Table S1.** Thermodynamic quantities, in eV, for  $N_2$  gas at standard conditions (298.15 K, 1 atm).

| Gas      | $E$ (+D) | $\int C_p dT$ | $-TS$ | ZPE  | $G$    |
|----------|----------|---------------|-------|------|--------|
| $N_2(g)$ | -16.24   | 0.09          | -0.59 | 0.15 | -16.59 |

In the case of clean surfaces and adsorbates, some approximations can be assumed. First and as for  $N_2$  gas at standard conditions,  $S_e \approx 0$  at the fundamental electronic level. Secondly, translational and rotational motions can be neglected, therefore,  $S_t \approx 0$  and  $S_r \approx 0$ . In this sense, all entropy contributions come from vibrations:  $S \approx S_v$ . Similarly, translational and rotational contributions to the heat capacity have been neglected. Therefore, for clean surfaces and adsorbates, free energies have been calculated as to:

$$G = E + \int C_p dT - TS_v + \text{ZPE} + D$$

Procedurally, vibrational frequencies have been calculated for all atoms, *i.e.*, without any structural constrain for any species, metallic or not. Following this procedure, **Table S2** gathers free energies for clean surfaces and  $*N_2$  adsorbates for the series of  $Li^0$  structures studied herein as well as for slabs of flat bcc- $Li^0$  surfaces, the latter being computed for comparison.

**Table S2.** Free energies (298.15 K), in eV, for clean surfaces and  $*N_2$  adsorbates.

| bcc- $Li^0$ slab ( $Li_{128}$ ), (001) surface, equivalent to (010) and (100) |         |               |         |                |         |
|-------------------------------------------------------------------------------|---------|---------------|---------|----------------|---------|
| State                                                                         | $G$     | State         | $G$     | State          | $G$     |
| clean                                                                         | -236.21 | end-on $*N_2$ | -252.72 | side-on $*N_2$ | -253.35 |

| <b>bcc-Li<sup>0</sup> slab (Li<sub>128</sub>), (101) surface, equivalent to (110) and (011)</b> |          |                           |          |                           |          |
|-------------------------------------------------------------------------------------------------|----------|---------------------------|----------|---------------------------|----------|
| <b>State</b>                                                                                    | <b>G</b> | <b>State</b>              | <b>G</b> | <b>State</b>              | <b>G</b> |
| clean                                                                                           | -238.99  | end-on *N <sub>2</sub>    | -255.37  | side-on *N <sub>2</sub>   | -255.93  |
| <b>Li<sup>0</sup> sub-nanocluster (Li<sub>1</sub>)</b>                                          |          |                           |          |                           |          |
| <b>State</b>                                                                                    | <b>G</b> | <b>State</b>              | <b>G</b> | <b>State</b>              | <b>G</b> |
| clean                                                                                           | -0.04    | min. [1] *N <sub>2</sub>  | -16.27   | min. [2] *N <sub>2</sub>  | -16.09   |
| <b>Li<sup>0</sup> sub-nanocluster (Li<sub>2</sub>)</b>                                          |          |                           |          |                           |          |
| <b>State</b>                                                                                    | <b>G</b> | <b>State</b>              | <b>G</b> | <b>State</b>              | <b>G</b> |
| clean                                                                                           | -1.38    | min. [1] *N <sub>2</sub>  | -17.64   | min. [2] *N <sub>2</sub>  | -17.67   |
| min. [3] *N <sub>2</sub>                                                                        | -17.43   |                           |          |                           |          |
| <b>Li<sup>0</sup> sub-nanocluster (Li<sub>6</sub>)</b>                                          |          |                           |          |                           |          |
| <b>State</b>                                                                                    | <b>G</b> | <b>State</b>              | <b>G</b> | <b>State</b>              | <b>G</b> |
| clean                                                                                           | -6.47    | min. [1] *N <sub>2</sub>  | -23.15   | min. [2] *N <sub>2</sub>  | -22.95   |
| min. [3] *N <sub>2</sub>                                                                        | -22.90   | min. [4] *N <sub>2</sub>  | -22.85   |                           |          |
| <b>Li<sup>0</sup> sub-nanocluster (Li<sub>15</sub>)</b>                                         |          |                           |          |                           |          |
| <b>State</b>                                                                                    | <b>G</b> | <b>State</b>              | <b>G</b> | <b>State</b>              | <b>G</b> |
| clean                                                                                           | -19.49   | min. [1] *N <sub>2</sub>  | -37.23   | min. [2] *N <sub>2</sub>  | -37.17   |
| min. [3] *N <sub>2</sub>                                                                        | -37.17   | min. [4] *N <sub>2</sub>  | -36.87   | min. [5] *N <sub>2</sub>  | -36.73   |
| min. [6] *N <sub>2</sub>                                                                        | -36.72   | min. [7] *N <sub>2</sub>  | -36.54   | min. [8] *N <sub>2</sub>  | -36.46   |
| min. [9] *N <sub>2</sub>                                                                        | -36.39   | min. [10] *N <sub>2</sub> | -36.11   |                           |          |
| <b>Li<sup>0</sup> sub-nanocluster (Li<sub>27</sub>)</b>                                         |          |                           |          |                           |          |
| <b>State</b>                                                                                    | <b>G</b> | <b>State</b>              | <b>G</b> | <b>State</b>              | <b>G</b> |
| clean                                                                                           | -38.08   | min. [1] *N <sub>2</sub>  | -57.02   | min. [2] *N <sub>2</sub>  | -56.93   |
| min. [3] *N <sub>2</sub>                                                                        | -56.87   | min. [4] *N <sub>2</sub>  | -56.79   | min. [5] *N <sub>2</sub>  | -56.71   |
| min. [6] *N <sub>2</sub>                                                                        | -56.06   | min. [7] *N <sub>2</sub>  | -56.11   | min. [8] *N <sub>2</sub>  | -56.03   |
| min. [9] *N <sub>2</sub>                                                                        | -55.91   |                           |          |                           |          |
| <b>Li<sup>0</sup> nanoparticle (Li<sub>51</sub>)</b>                                            |          |                           |          |                           |          |
| <b>State</b>                                                                                    | <b>G</b> | <b>State</b>              | <b>G</b> | <b>State</b>              | <b>G</b> |
| clean                                                                                           | -78.20   | min. [1] *N <sub>2</sub>  | -97.37   | min. [2] *N <sub>2</sub>  | -97.39   |
| min. [3] *N <sub>2</sub>                                                                        | -97.26   | min. [4] *N <sub>2</sub>  | -97.27   | min. [5] *N <sub>2</sub>  | -97.25   |
| min. [6] *N <sub>2</sub>                                                                        | -97.21   | min. [7] *N <sub>2</sub>  | -97.09   | min. [8] *N <sub>2</sub>  | -97.13   |
| min. [9] *N <sub>2</sub>                                                                        | -96.37   | min. [10] *N <sub>2</sub> | -96.37   | min. [11] *N <sub>2</sub> | -96.50   |

| <b>Li<sup>0</sup> nanoparticle (Li<sub>51</sub>), second N<sub>2</sub> adsorption from min. [1] described above</b> |          |                           |          |                           |          |
|---------------------------------------------------------------------------------------------------------------------|----------|---------------------------|----------|---------------------------|----------|
| <b>State</b>                                                                                                        | <b>G</b> | <b>State</b>              | <b>G</b> | <b>State</b>              | <b>G</b> |
| min. [1] *N <sub>2</sub>                                                                                            | -114.79  | min. [2] *N <sub>2</sub>  | -114.76  | min. [3] *N <sub>2</sub>  | -114.80  |
| min. [4] *N <sub>2</sub>                                                                                            | -114.65  | min. [5] *N <sub>2</sub>  | -114.56  | min. [6] *N <sub>2</sub>  | -114.60  |
| min. [7] *N <sub>2</sub>                                                                                            | -114.58  | min. [8] *N <sub>2</sub>  | -114.47  | min. [9] *N <sub>2</sub>  | -114.44  |
| min. [10] *N <sub>2</sub>                                                                                           | -114.50  | min. [11] *N <sub>2</sub> | -114.49  | min. [12] *N <sub>2</sub> | -114.42  |
| min. [13] *N <sub>2</sub>                                                                                           | -114.38  | min. [14] *N <sub>2</sub> | -114.03  | min. [15] *N <sub>2</sub> | -113.96  |
| min. [16] *N <sub>2</sub>                                                                                           | -113.91  | min. [17] *N <sub>2</sub> | -113.88  | min. [18] *N <sub>2</sub> | -113.84  |
| min. [19] *N <sub>2</sub>                                                                                           | -113.82  |                           |          |                           |          |

Free energies for TSs are also shown in **Table S3**.

**Table S3.** Free energies (298.15 K), in eV, for TSs of \*N<sub>2</sub> cleavage, with indication of the imaginary frequency (IF), in cm<sup>-1</sup>.

| <b>bcc-Li<sup>0</sup> slab (Li<sub>128</sub>), (001) surface, equivalent to (010) and (100)</b> |          |                |                 |          |                |
|-------------------------------------------------------------------------------------------------|----------|----------------|-----------------|----------|----------------|
| <b>State</b>                                                                                    | <b>G</b> | <b>IF</b>      | <b>State</b>    | <b>G</b> | <b>IF</b>      |
| TS <sub>1</sub>                                                                                 | -255.34  | 410.2 <i>i</i> |                 |          |                |
| <b>bcc-Li<sup>0</sup> slab (Li<sub>128</sub>), (101) surface, equivalent to (110) and (011)</b> |          |                |                 |          |                |
| <b>State</b>                                                                                    | <b>G</b> | <b>IF</b>      | <b>State</b>    | <b>G</b> | <b>IF</b>      |
| TS <sub>1</sub>                                                                                 | -255.50  | 436.0 <i>i</i> | TS <sub>2</sub> | -255.59  | 428.0 <i>i</i> |
| <b>Li<sup>0</sup> nanoparticle (Li<sub>51</sub>)</b>                                            |          |                |                 |          |                |
| <b>State</b>                                                                                    | <b>G</b> | <b>IF</b>      | <b>State</b>    | <b>G</b> | <b>IF</b>      |
| TS <sub>1</sub>                                                                                 | -96.76   | 413.7 <i>i</i> | TS <sub>2</sub> | -96.80   | 459.8 <i>i</i> |
| TS <sub>3</sub>                                                                                 | -96.72   | 398.4 <i>i</i> | TS <sub>4</sub> | -96.84   | 410.2 <i>i</i> |
| TS <sub>5</sub>                                                                                 | -96.62   | 399.7 <i>i</i> | TS <sub>6</sub> | -96.74   | 418.0 <i>i</i> |

Note that binding free energies for N<sub>2</sub> adsorption,  $\Delta G(*N_2)$ , and free energy barriers for \*N<sub>2</sub> cleavage,  $\Delta G^\ddagger$ , have been calculated as:

$$\Delta G(*N_2) = G(*N_2) - G[N_2(g)] - G(*)$$

$$\Delta G^\ddagger = G(TS) - G(*N_2)$$

where  $G(*N_2)$ ,  $G[N_2(g)]$ ,  $G(*)$ , and  $G(TS)$  refer to the free energies of adsorbed \*N<sub>2</sub>, N<sub>2</sub> gas, clean surface, and TS for N<sub>2</sub> cleavage, respectively, which can be found in **Tables S2** and **S3**.

### Section 3. Additional figures

Below, a series of optimised structures for both minima and TSs not included in the main manuscript are shown.

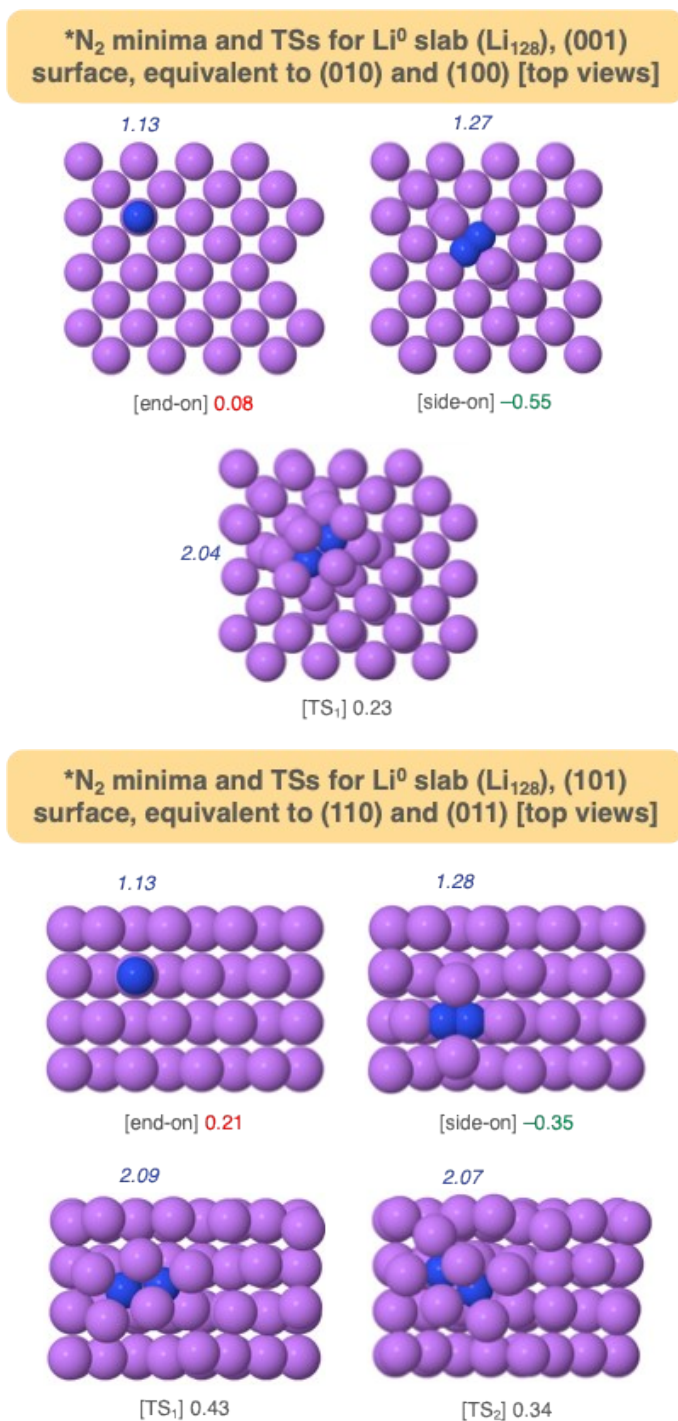

**Figure S1.** \*N<sub>2</sub> minima and TSs obtained for flat bcc-Li<sup>0</sup> surfaces. N≡N distances (Å) are shown in *blue*. Binding free energies (eV) for \*N<sub>2</sub> minima are shown in green (spontaneous) and red (non-spontaneous), while activation free energies (eV) for TSs corresponding to N<sub>2</sub> cleavage are shown in grey.

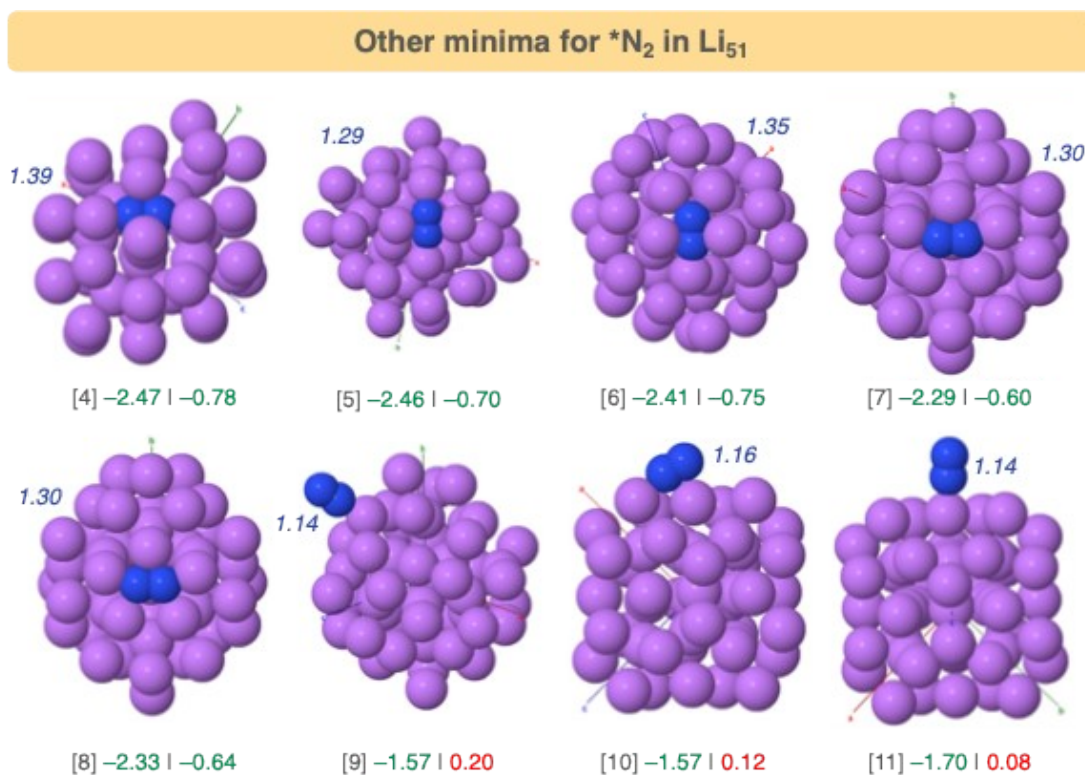

**Figure S2.** Other \*N<sub>2</sub> minima for the Li<sub>51</sub> nanoparticle. N≡N distances (Å) are shown in *blue*. Binding free energies (eV) are shown in green (spontaneous) and red (non-spontaneous).

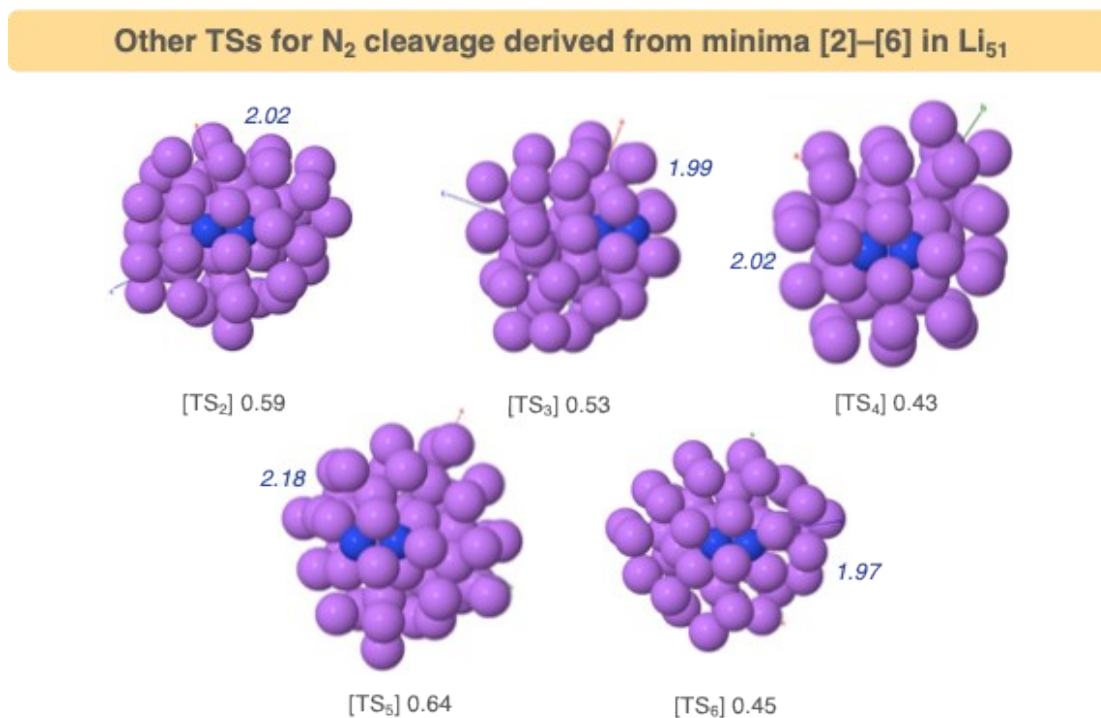

**Figure S3.** Other TSs for N<sub>2</sub> cleavage derived from minima [2]–[6] for the Li<sub>51</sub> nanoparticle. N≡N distances (Å) are shown in *blue*. Activation free energies (eV) are also shown.

Other minima for second capture of N<sub>2</sub> from \*N<sub>2</sub> minimum [1] for Li<sub>51</sub>

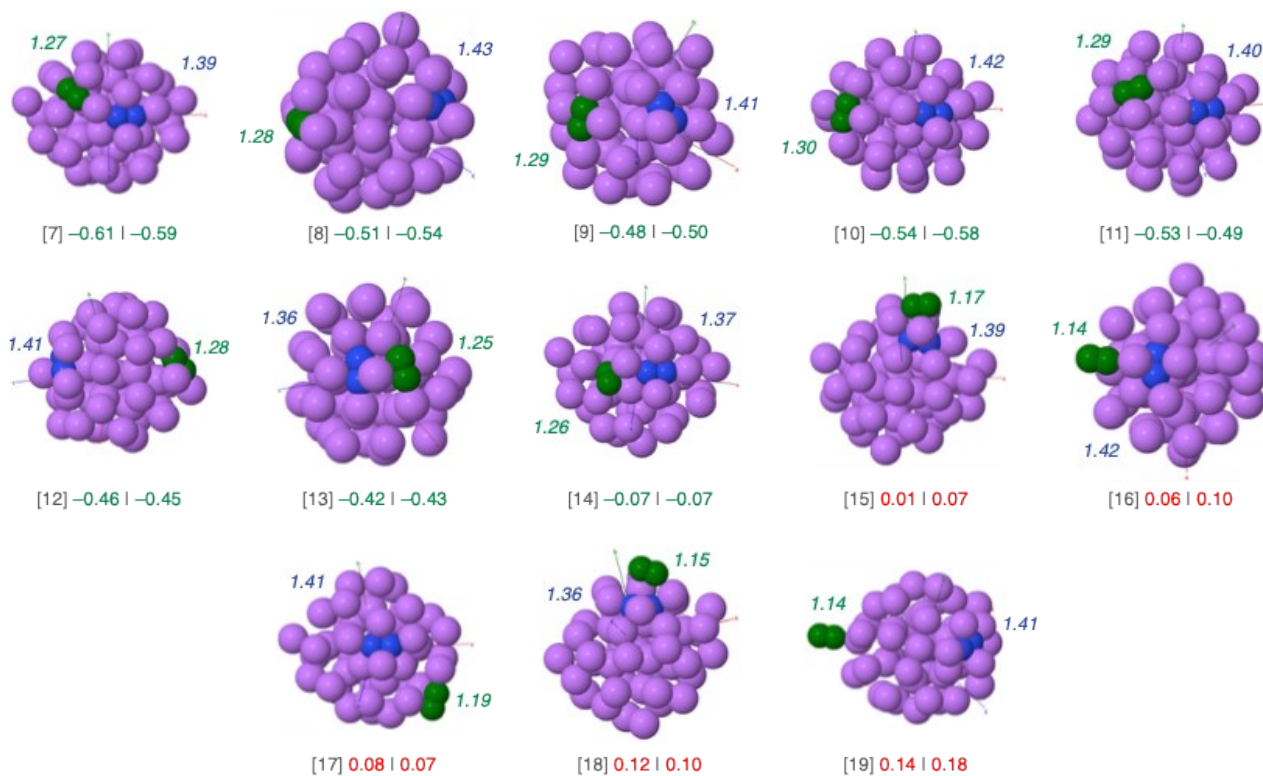

**Figure S4.** Other minima corresponding to a second N<sub>2</sub> adsorption from minimum [1] of the Li<sub>51</sub> nanoparticle. N≡N distances (Å) are shown in *blue* (first \*N<sub>2</sub>) and *green* (second \*N<sub>2</sub>). Binding free energies (eV) are shown in green (spontaneous) and red (non-spontaneous).

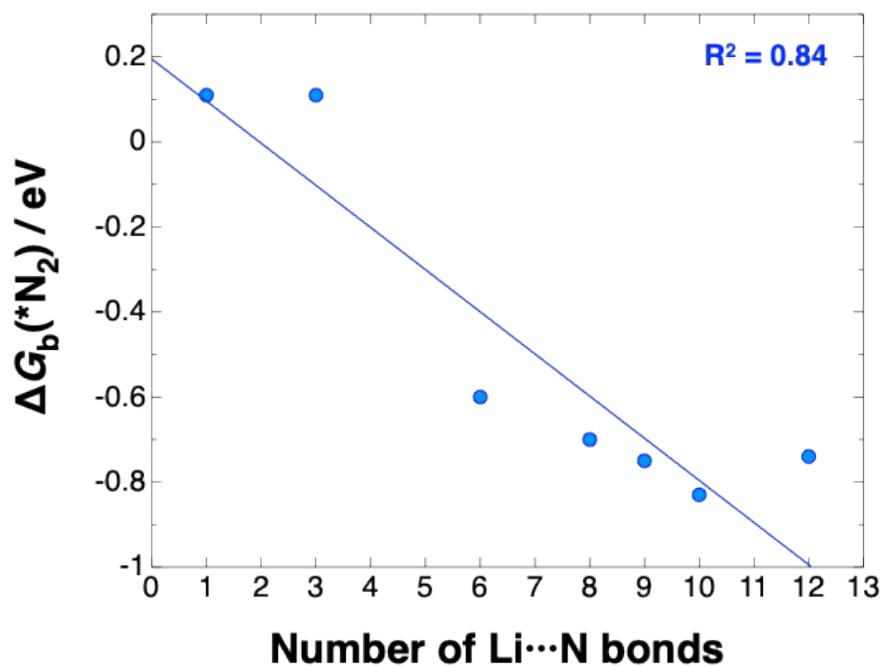

**Figure S5.** Average of binding free energies, ΔG<sub>b</sub> (in eV), for \*N<sub>2</sub> minima in Li<sub>27</sub> and Li<sub>51</sub> models vs. number of Li...N bonds with distance of 2.5 Å or less, showing correlation, *i.e.*, binding free energy becomes stronger as the number of Li...N bonds increases.

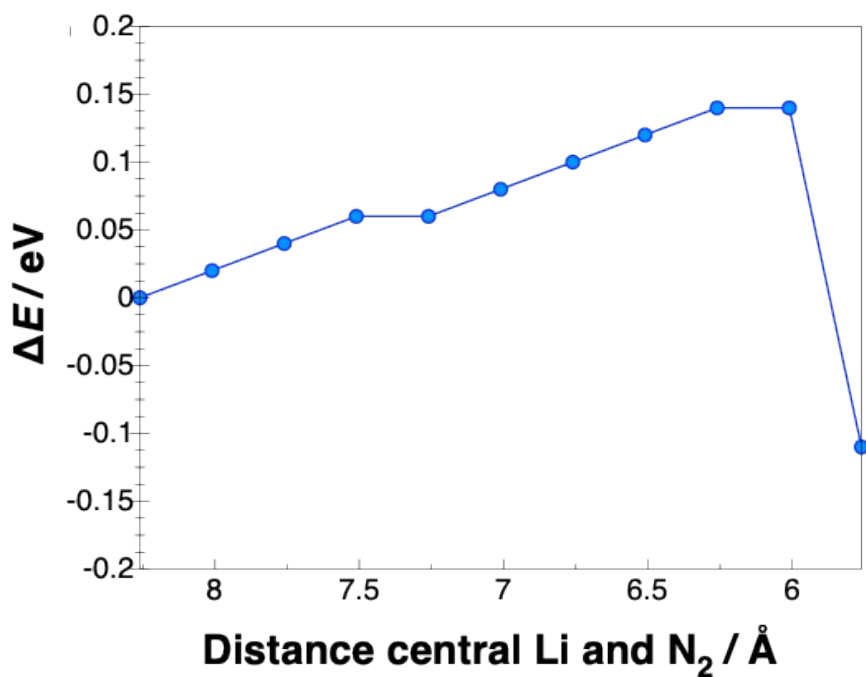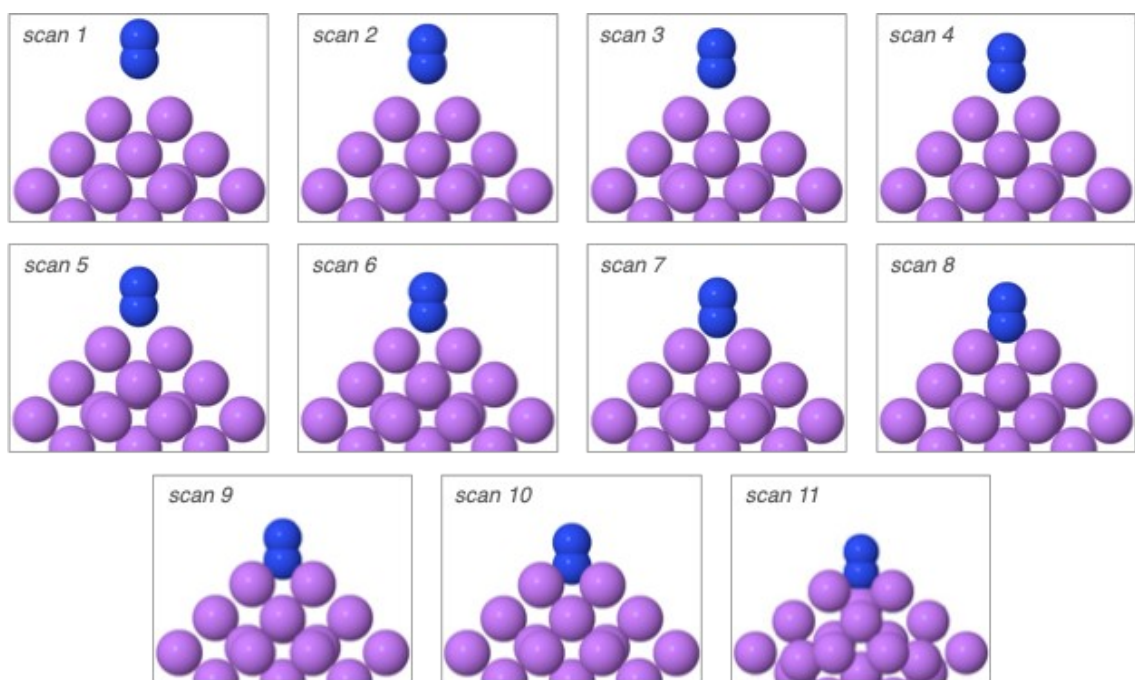

**Figure S6.** Electronic energy profile (eV) for the constrained approach of N<sub>2</sub> towards the Li<sub>51</sub> nanoparticle. The Li–N distance between the central Li atom and the N<sub>2</sub> molecule (Å) was constrained while all other coordinates were fully relaxed. Optimised structures along the approach coordinate are also shown. Note: force convergence criterion was set to |0.02| eV/Å for these calculations.

## Section 4. Optimised XYZ coordinates (in Å) for symmetrical Li<sup>0</sup> nanostructures

|    |             |                  |             |
|----|-------------|------------------|-------------|
|    |             | Li <sub>1</sub>  |             |
| Li | 10.00000000 | 10.00000000      | 10.00000000 |
| a  | 20.00000000 | 0.00000000       | 0.00000000  |
| b  | 0.00000000  | 20.00000000      | 0.00000000  |
| c  | 0.00000000  | 0.00000000       | 20.00000000 |
|    |             | Li <sub>2</sub>  |             |
| Li | 10.05961937 | 10.00000000      | 10.00000000 |
| Li | 13.45038063 | 10.00000000      | 10.00000000 |
| a  | 23.51000000 | 0.00000000       | 0.00000000  |
| b  | 0.00000000  | 20.00000000      | 0.00000000  |
| c  | 0.00000000  | 0.00000000       | 20.00000000 |
|    |             | Li <sub>6</sub>  |             |
| Li | 13.54033234 | 13.54033234      | 11.75500000 |
| Li | 11.75450000 | 11.75450000      | 10.42204331 |
| Li | 9.96866766  | 9.96866766       | 11.75500000 |
| Li | 11.75450000 | 11.75450000      | 13.08795669 |
| Li | 13.54033234 | 9.96866766       | 11.75500000 |
| Li | 9.96866766  | 13.54033234      | 11.75500000 |
| a  | 23.50900000 | 0.00000000       | 0.00000000  |
| b  | 0.00000000  | 23.50900000      | 0.00000000  |
| c  | 0.00000000  | 0.00000000       | 23.51000000 |
|    |             | Li <sub>15</sub> |             |
| Li | 13.50900000 | 13.50900000      | 13.50900000 |
| Li | 15.15601767 | 15.15601767      | 15.15601767 |
| Li | 11.86198233 | 11.86198233      | 11.86198233 |
| Li | 15.15601767 | 11.86198233      | 11.86198233 |
| Li | 11.86198233 | 15.15601767      | 11.86198233 |
| Li | 13.50900000 | 13.50900000      | 9.89314690  |
| Li | 15.15601767 | 15.15601767      | 11.86198233 |
| Li | 11.86198233 | 11.86198233      | 15.15601767 |
| Li | 13.50900000 | 9.89314690       | 13.50900000 |
| Li | 15.15601767 | 11.86198233      | 15.15601767 |
| Li | 9.89314690  | 13.50900000      | 13.50900000 |
| Li | 11.86198233 | 15.15601767      | 15.15601767 |
| Li | 17.12485310 | 13.50900000      | 13.50900000 |
| Li | 13.50900000 | 17.12485310      | 13.50900000 |
| Li | 13.50900000 | 13.50900000      | 17.12485310 |
| a  | 27.01800000 | 0.00000000       | 0.00000000  |
| b  | 0.00000000  | 27.01800000      | 0.00000000  |
| c  | 0.00000000  | 0.00000000       | 27.01800000 |
|    |             | Li <sub>27</sub> |             |
| Li | 13.50900000 | 13.50900000      | 13.50900000 |
| Li | 15.15970972 | 15.15970972      | 15.15970972 |
| Li | 11.85829028 | 11.85829028      | 11.85829028 |
| Li | 13.50900000 | 10.18273322      | 10.18273322 |
| Li | 15.15970972 | 11.85829028      | 11.85829028 |
| Li | 10.18273322 | 13.50900000      | 10.18273322 |
| Li | 11.85829028 | 15.15970972      | 11.85829028 |
| Li | 13.50900000 | 13.50900000      | 9.99814680  |
| Li | 15.15970972 | 15.15970972      | 11.85829028 |
| Li | 16.83526678 | 13.50900000      | 10.18273322 |
| Li | 13.50900000 | 16.83526678      | 10.18273322 |
| Li | 10.18273322 | 10.18273322      | 13.50900000 |
| Li | 11.85829028 | 11.85829028      | 15.15970972 |

|                  |             |             |             |
|------------------|-------------|-------------|-------------|
| Li               | 13.50900000 | 9.99814680  | 13.50900000 |
| Li               | 15.15970972 | 11.85829028 | 15.15970972 |
| Li               | 16.83526678 | 10.18273322 | 13.50900000 |
| Li               | 9.99814680  | 13.50900000 | 13.50900000 |
| Li               | 11.85829028 | 15.15970972 | 15.15970972 |
| Li               | 17.01985320 | 13.50900000 | 13.50900000 |
| Li               | 10.18273322 | 16.83526678 | 13.50900000 |
| Li               | 13.50900000 | 17.01985320 | 13.50900000 |
| Li               | 16.83526678 | 16.83526678 | 13.50900000 |
| Li               | 13.50900000 | 10.18273322 | 16.83526678 |
| Li               | 10.18273322 | 13.50900000 | 16.83526678 |
| Li               | 13.50900000 | 13.50900000 | 17.01985320 |
| Li               | 16.83526678 | 13.50900000 | 16.83526678 |
| Li               | 13.50900000 | 16.83526678 | 16.83526678 |
| a                | 27.01800000 | 0.00000000  | 0.00000000  |
| b                | 0.00000000  | 27.01800000 | 0.00000000  |
| c                | 0.00000000  | 0.00000000  | 27.01800000 |
| Li <sub>51</sub> |             |             |             |
| Li               | 15.26400000 | 15.26400000 | 15.26400000 |
| Li               | 17.04448190 | 17.04448190 | 17.04448190 |
| Li               | 13.72600775 | 13.72600775 | 10.00392904 |
| Li               | 16.80199225 | 13.72600775 | 10.00392904 |
| Li               | 13.72600775 | 16.80199225 | 10.00392904 |
| Li               | 16.80199225 | 16.80199225 | 10.00392904 |
| Li               | 13.72600775 | 10.00392904 | 13.72600775 |
| Li               | 16.80199225 | 10.00392904 | 13.72600775 |
| Li               | 10.00392904 | 13.72600775 | 13.72600775 |
| Li               | 13.48351810 | 13.48351810 | 13.48351810 |
| Li               | 15.26400000 | 11.86557631 | 11.86557631 |
| Li               | 17.04448190 | 13.48351810 | 13.48351810 |
| Li               | 20.52407096 | 13.72600775 | 13.72600775 |
| Li               | 10.00392904 | 16.80199225 | 13.72600775 |
| Li               | 11.86557631 | 15.26400000 | 11.86557631 |
| Li               | 13.48351810 | 17.04448190 | 13.48351810 |
| Li               | 15.26400000 | 15.26400000 | 11.85870306 |
| Li               | 17.04448190 | 17.04448190 | 13.48351810 |
| Li               | 18.66242369 | 15.26400000 | 11.86557631 |
| Li               | 20.52407096 | 16.80199225 | 13.72600775 |
| Li               | 13.72600775 | 20.52407096 | 13.72600775 |
| Li               | 15.26400000 | 18.66242369 | 11.86557631 |
| Li               | 16.80199225 | 20.52407096 | 13.72600775 |
| Li               | 13.72600775 | 10.00392904 | 16.80199225 |
| Li               | 16.80199225 | 10.00392904 | 16.80199225 |
| Li               | 10.00392904 | 13.72600775 | 16.80199225 |
| Li               | 11.86557631 | 11.86557631 | 15.26400000 |
| Li               | 13.48351810 | 13.48351810 | 17.04448190 |
| Li               | 15.26400000 | 11.85870306 | 15.26400000 |
| Li               | 17.04448190 | 13.48351810 | 17.04448190 |
| Li               | 18.66242369 | 11.86557631 | 15.26400000 |
| Li               | 20.52407096 | 13.72600775 | 16.80199225 |
| Li               | 10.00392904 | 16.80199225 | 16.80199225 |
| Li               | 11.85870306 | 15.26400000 | 15.26400000 |
| Li               | 13.48351810 | 17.04448190 | 17.04448190 |
| Li               | 18.66929694 | 15.26400000 | 15.26400000 |
| Li               | 20.52407096 | 16.80199225 | 16.80199225 |
| Li               | 11.86557631 | 18.66242369 | 15.26400000 |

|          |             |             |             |
|----------|-------------|-------------|-------------|
| Li       | 13.72600775 | 20.52407096 | 16.80199225 |
| Li       | 15.26400000 | 18.66929694 | 15.26400000 |
| Li       | 16.80199225 | 20.52407096 | 16.80199225 |
| Li       | 18.66242369 | 18.66242369 | 15.26400000 |
| Li       | 13.72600775 | 13.72600775 | 20.52407096 |
| Li       | 15.26400000 | 11.86557631 | 18.66242369 |
| Li       | 16.80199225 | 13.72600775 | 20.52407096 |
| Li       | 11.86557631 | 15.26400000 | 18.66242369 |
| Li       | 13.72600775 | 16.80199225 | 20.52407096 |
| Li       | 15.26400000 | 15.26400000 | 18.66929694 |
| Li       | 16.80199225 | 16.80199225 | 20.52407096 |
| Li       | 18.66242369 | 15.26400000 | 18.66242369 |
| Li       | 15.26400000 | 18.66242369 | 18.66242369 |
| <i>a</i> | 30.52800000 | 0.00000000  | 0.00000000  |
| <i>b</i> | 0.00000000  | 30.52800000 | 0.00000000  |
| <i>c</i> | 0.00000000  | 0.00000000  | 30.52800000 |

## REFERENCES

- S1 B. Hammer, L. B. Hansen and J. K. Nørskov, *Phys. Rev. B*, 1999, **59**, 7413–7421.
- S2 H. J. Monkhorst and J. D. Pack, *Phys. Rev. B*, 1976, **13**, 5188–5192.
- S3 G. Henkelman and H. Jónsson, *J. Chem. Phys.*, 1999, **111**, 7010–7022.
- S4 A. Heyden, A. T. Bell and F. J. Keil, *J. Chem. Phys.*, 2005, **123**, 224101.
- S5 S. Grimme, J. Antony, S. Ehrlich and H. Krieg, *J. Chem. Phys.*, 2010, **132**, 154104.
- S6 S. Grimme, S. Ehrlich and L. Goerigk, *J. Comput. Chem.*, 2011, **32**, 1456–1465.
- S7 G. Kresse and J. Hafner, *Phys. Rev. B*, 1993, **47**, 558–561.
- S8 G. Kresse and J. Hafner, *Phys. Rev. B*, 1994, **49**, 14251–14269.
- S9 G. Kresse and J. Furthmüller, *Phys. Rev. B*, 1996, **54**, 11169–11186.
- S10 G. Kresse and J. Furthmüller, *Comput. Mater. Sci.*, 1996, **6**, 15–50.
